# Supplementary material for: Glucose-functionalized Au nanoprisms for optoacoustic imaging and near-infrared photothermal therapy
Source: Royal Society of Chemistry journal article supplement (doi:10.1039/c5nr06261f), 2015-12-03

## Supporting Information:

### Glucose-Functionalized Au Nanoprisms for Optoacoustic Imaging and Near-Infrared Photothermal Therapy

*Jishu Han,<sup>a,b</sup> Jingjing Zhang,<sup>a</sup> Meng Yang,<sup>a</sup> Daxiang Cui <sup>a\*</sup> and Jesus M. de la Fuente <sup>a,c\*</sup>*

*<sup>a</sup> Institute of Nano Biomedicine and Engineering, Key Laboratory for Thin Film and Microfabrication Technology of the Ministry of Education, Department of Instrument Science and Engineering, School of Electronic Information and Electronic Engineering, Shanghai Jiao Tong University, Shanghai 200240, P. R. China E-mail: dx cui@sjtu.edu.cn*

*<sup>b</sup> Key Laboratory of Eco-chemical Engineering, Ministry of Education, Laboratory of Inorganic Synthesis and Applied Chemistry, College of Chemistry and Molecular Engineering, Qingdao University of Science and Technology, Qingdao 266042, P. R. China.*

*<sup>c</sup> Instituto de Ciencia de Materiales de Aragon (ICMA), CSIC/Universidad de Zaragoza, Zaragoza, 50018, Spain E-mail: jmfuente@unizar.es*

**Figure S1.** The evolution of the UV-vis absorption of Au NPrs purify through centrifugation. The centrifugal speed is from 4000 to 6000 rpm for 10 min three times.

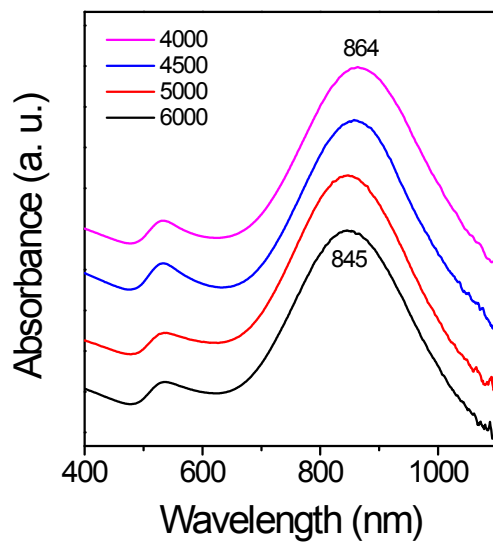

**Figure S2.** TEM image of Au@PEG NPrs.

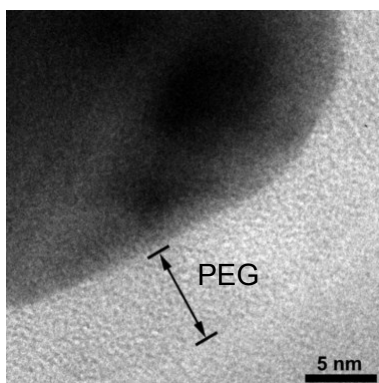

**Figure S3.** The UV-vis absorption of freshly prepared Au@PEG NPrs and 10 months

stored Au@PEG NPrs.

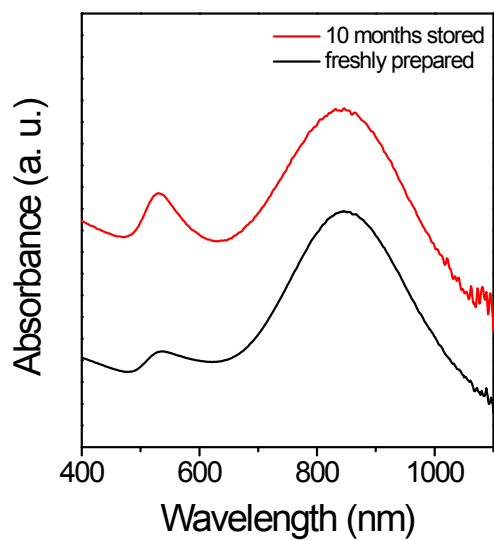

**Figure S4.** The UV-vis absorption of glucose.

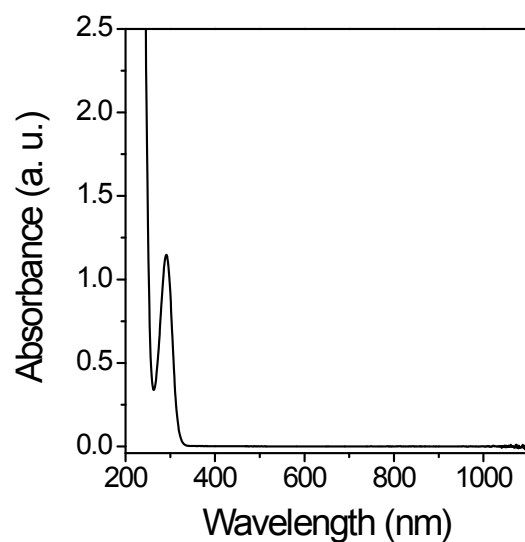

**Figure S5.** Cytotoxicity of Au@PEG-Glc NPrs, which is tested by incubating gastric

cells in 100  $\mu\text{L}$  culture medium with different concentrations of Au@PEG-Glc NPRs for 24 h, and followed by MTT assay. Data are shown as the means  $\pm$  standard error of the means, \*  $p < 0.05$  and \*\*  $p < 0.01$ .

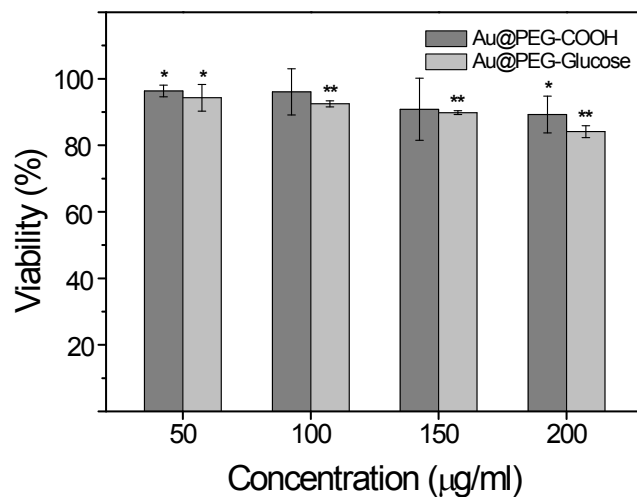

**Figure S6.** Gastric cell viabilities versus the concentration of Au@PEG-Glc NPRs, which is studied by 808 nm laser irradiation for 5 min (a). And gastric cell viabilities filled with 80  $\mu\text{g}$  Au@PEG-Glc NPRs versus the irradiation time (b). Data are shown as the means  $\pm$  standard error of the means, \*  $p < 0.05$  and \*\*  $p < 0.01$ .

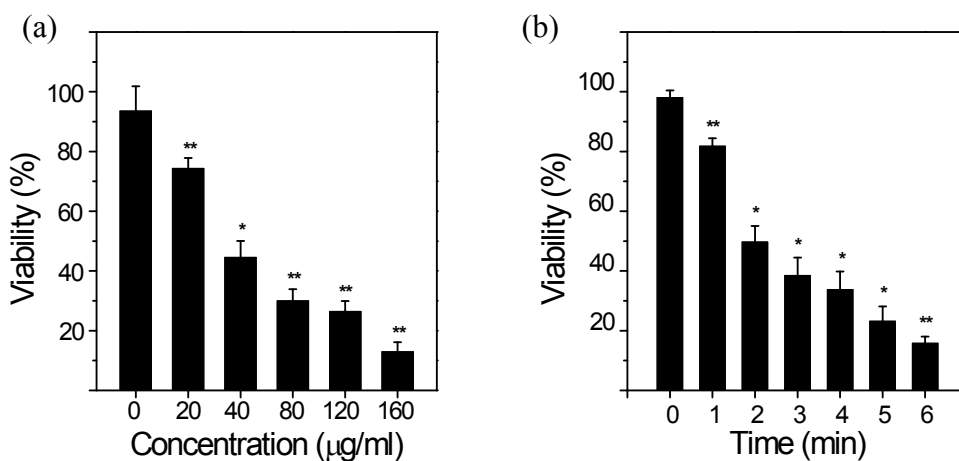

**Figure S7.** Optoacoustic signals of Au NPRs solution versus the concentration of

Au@PEG-Glc NPRs and the corresponding optoacoustic images.

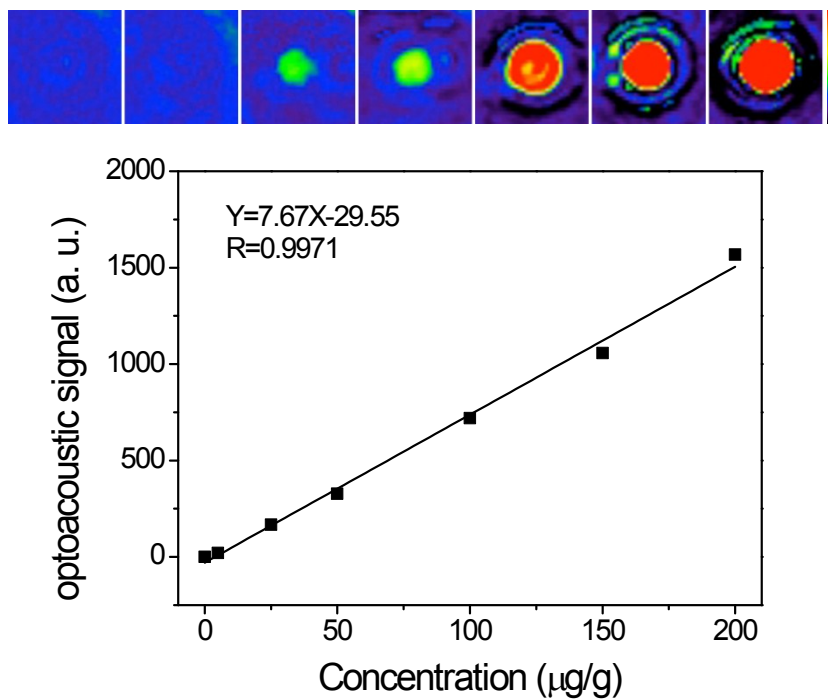

**Figure S8.** Optoacoustic signals of Au@PEG NPRs in tumor region acquired before injection (0 h) and after injection (2, 6, 12, 18 and 24 h). The scale bar is 2 mm.

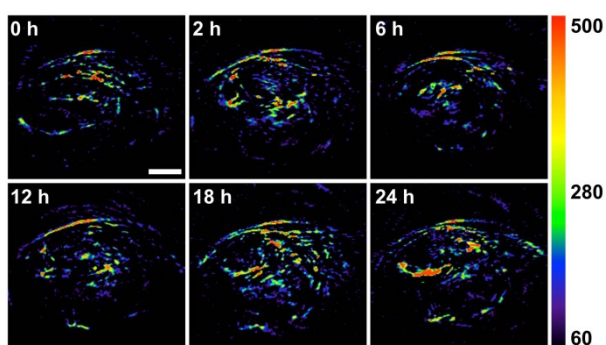

**Figure S9.** Photograph of the cured mouse through photothermal therapy after two

months.

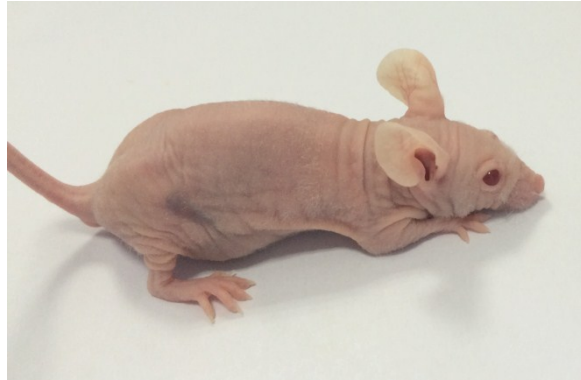

Supplement: c5nr06261f1.pdf [file c5nr06261f1.pdf]
